# Supplementary material
Source: MDPI journal article supplement (https://www.mdpi.com/2073-4433/13/12/2042)
Supplement: s1 [file s1]

Supplementary Materials:

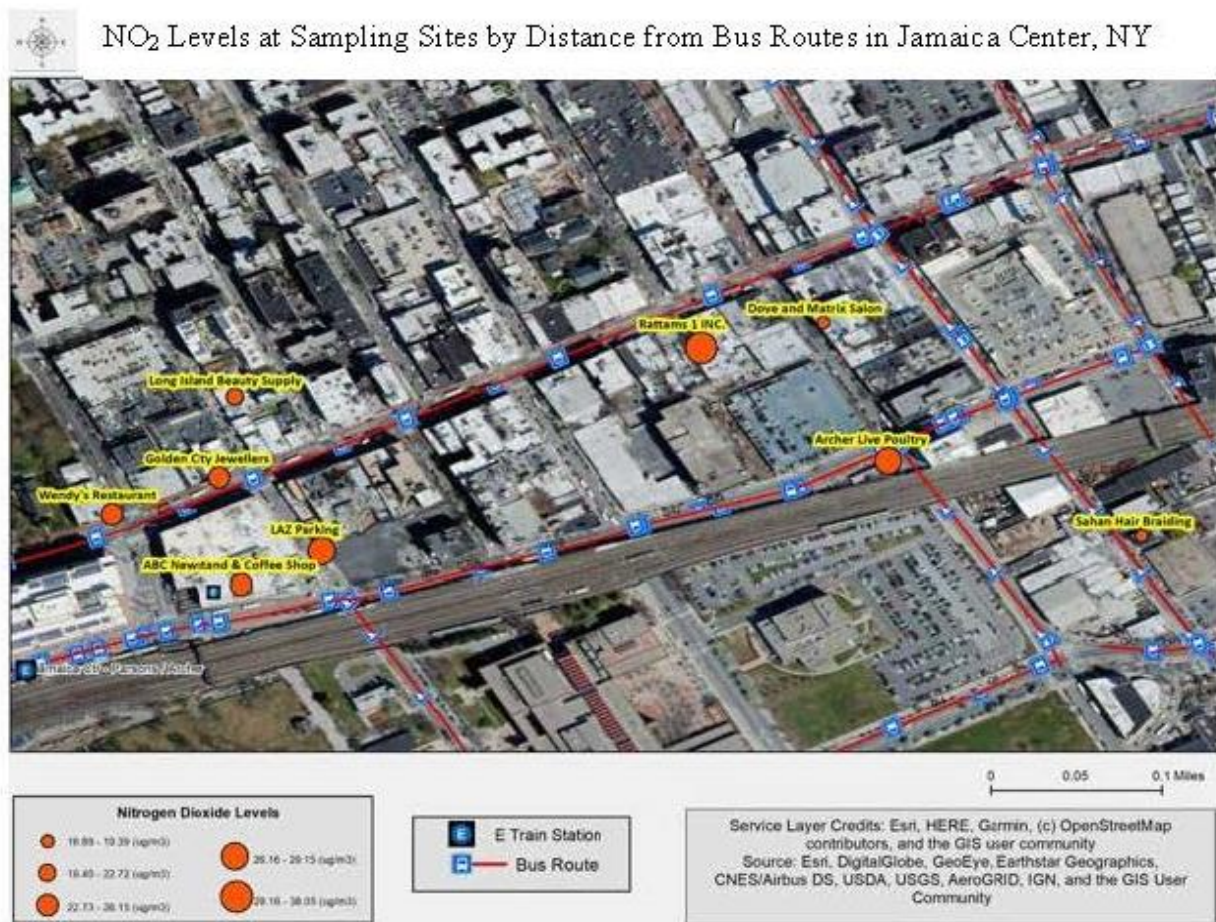

**Figure S1.** Study Sites at Jamaica Center

**Table S1.** NO<sub>2</sub> and O<sub>3</sub> Measurements in Winter, Fall, and Summer of 2019 in Jamaica Center

| Air Monitoring Station        | Site | NO <sub>2</sub> µg/m <sup>3</sup> Winter | NO <sub>2</sub> µg/m <sup>3</sup> Fall | NO <sub>2</sub> µg/m <sup>3</sup> Summer | O <sub>3</sub> µg/m <sup>3</sup> Fall | O <sub>3</sub> µg/m <sup>3</sup> Summer |
|-------------------------------|------|------------------------------------------|----------------------------------------|------------------------------------------|---------------------------------------|-----------------------------------------|
| (1) ABC Newsstand Coffee Shop | HT-1 | 24.4                                     | 42.76                                  | 29.68                                    | 53.2                                  | 36.34                                   |
| (2) Golden City Jeweler's     | HT-2 | 25.1                                     | 58                                     | 41.74                                    | 38                                    | 38.45                                   |
| (3) LAZ Parking               | HT-3 | 27.96                                    | 35.74                                  | 41.49                                    | 57.6                                  | 21.47                                   |
| (4) Sahan Hair Braiding       | LT-4 | 16.89                                    | 30.6                                   | 22.75                                    | 54.3                                  | 39.73                                   |
| (5) Archer Live Poultry       | HT-5 | 29.15                                    | 34.64                                  | 34.7                                     | 60                                    | 40.74                                   |
| (6) Dove and Matrix Salon     | LT-6 | 19.39                                    | 32.99                                  | 28.14                                    | 59.2                                  | 52.25                                   |
| (7) Rattans Inc.              | HT-7 | 38.05                                    | 44.9                                   | 40.68                                    | 70.8                                  | 65.03                                   |
| (8) Long Island Beauty Supply | LT-8 | 22.72                                    | 29.09                                  | 25.05                                    | 46.5                                  | 45.54                                   |
| (9) Wendy's Restaurant        | HT-9 | 26.15                                    | 34.58                                  | 34.46                                    | 53.3                                  | 47.21                                   |

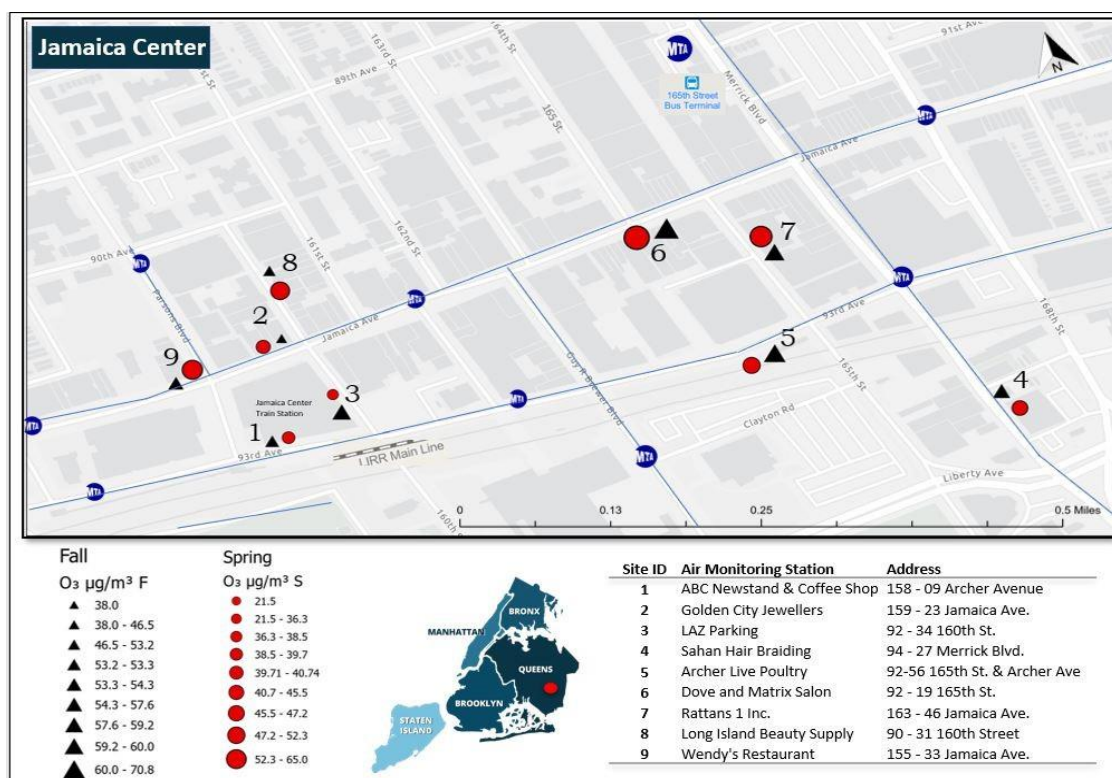

Figure S2. Locations and  $O_3$  concentrations in fall and spring of 2019

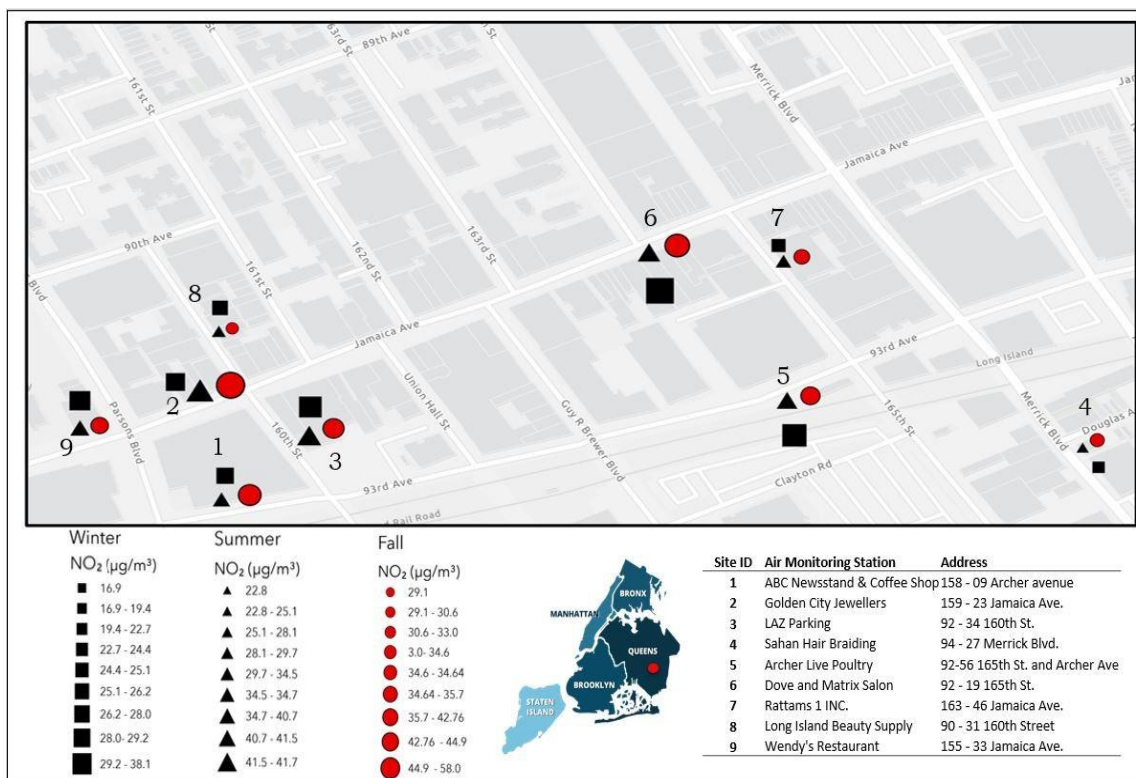

Figure S3. Locations and  $NO_2$  concentrations in fall, summer, and winter of 2019
